# Supplementary material
Source: PubMed Central journal article supplement (PMC3664521)
Supplement: NIHMS363695-supplement-supplement_1.pdf [file NIHMS363695-supplement-supplement_1.pdf]

Supplemental Table 1. Type 2 diabetes-related SNPs, minor allele frequencies for SHS and SHFS across centers and meta-analyses p-values for eGFR and LACR

| SNP        | Gene                 | Alleles      |              | Minor Allele Frequency* |        |          | Meta-analyses P-values |       |
|------------|----------------------|--------------|--------------|-------------------------|--------|----------|------------------------|-------|
|            |                      | Minor allele | Major allele | Arizona                 | Dakota | Oklahoma | eGFR                   | LACR  |
| rs10010131 | <i>WFS1</i>          | A            | G            | 0.03                    | 0.15   | 0.17     | 0.005                  | 0.009 |
| rs10811661 | <i>CDKN2A/CDKN2B</i> | C            | T            | 0.07                    | 0.19   | 0.11     | 0.94                   | 0.29  |
| rs10923931 | <i>NOTCH2</i>        | T            | G            | 0.11                    | 0.07   | 0.10     | 0.24                   | 0.27  |
| rs1111875† | <i>HHEX</i>          | T            | C            | 0.43                    | 0.45   | 0.40     | 0.47                   | 0.22  |
| rs12779790 | <i>CAMK1D</i>        | G            | A            | 0.14                    | 0.15   | 0.15     | 0.88                   | 0.17  |
| rs1801282  | <i>PPARG</i>         | G            | C            | 0.08                    | 0.08   | 0.20     | 0.62                   | 0.03  |
| rs2383208  | <i>CDKN2A/CDKN2B</i> | G            | A            | 0.07                    | 0.18   | 0.10     | 0.66                   | 0.28  |
| rs4402960  | <i>IGF2BP2</i>       | T            | G            | 0.18                    | 0.13   | 0.19     | 0.13                   | 0.10  |
| rs4607103  | <i>ADAMTS9</i>       | T            | C            | 0.39                    | 0.34   | 0.32     | 0.79                   | 0.27  |
| rs5219     | <i>KCNJ11</i>        | T            | C            | 0.37                    | 0.31   | 0.35     | 0.002                  | 0.92  |
| rs7578597  | <i>THADA</i>         | C            | T            | 0.00                    | 0.03   | 0.04     | 0.05                   | 0.29  |
| rs780094   | <i>GCKR</i>          | T            | C            | 0.05                    | 0.27   | 0.25     | 0.09                   | 0.55  |
| rs7901695  | <i>TCF7L2</i>        | C            | T            | 0.08                    | 0.11   | 0.14     | 0.0008                 | 0.74  |
| rs7903146  | <i>TCF7L2</i>        | T            | C            | 0.08                    | 0.11   | 0.13     | 0.005                  | 0.41  |
| rs7961581  | <i>TSPAN8</i>        | C            | T            | 0.01                    | 0.09   | 0.10     | 0.04                   | 0.58  |
| rs8050136  | <i>FTO</i>           | A            | C            | 0.12                    | 0.09   | 0.13     | 0.002                  | 0.98  |
| rs864745   | <i>JAZF1</i>         | C            | T            | 0.20                    | 0.36   | 0.33     | 0.37                   | 0.02  |
| rs9939609  | <i>FTO</i>           | A            | T            | 0.12                    | 0.09   | 0.13     | 0.003                  | 0.89  |

\* In the family data, estimated in a subset of unrelated individuals in the SHFS: N=185 Arizona, N=205 in Dakotas and N=175 in Oklahoma  
 SNP, single nucleotide polymorphism; † minor allele is C in the Arizona center

Supplemental Table 2. Meta-analyses results of age-specific effects of rs10010131 (*WFS1* gene) on eGFR

| Age in years | Coded allele | Other allele | $\beta$ per allele copy | SE     | <i>P</i> value | Total No. |
|--------------|--------------|--------------|-------------------------|--------|----------------|-----------|
| Less 45      | G            | A            | 0.151                   | 0.0417 | 0.0003         | 2249      |
| 45-59        | G            | A            | 0.0341                  | 0.0392 | 0.38           | 2996      |
| 60 or more   | G            | A            | 0.0044                  | 0.0514 | 0.94           | 1587      |
| Total        |              |              | 0.1506                  | 0.0445 | 0.0007         | 6832      |

Supplemental Table 3. Association results from diabetes-specific strata

| SNP        | Gene          | Alleles      |              | eGFR           |                    | UACR           |                    | eGFR                 | UACR                 |
|------------|---------------|--------------|--------------|----------------|--------------------|----------------|--------------------|----------------------|----------------------|
|            |               | Coded allele | Other allele | T2D<br>(2,251) | Non-T2D<br>(4,601) | T2D<br>(2,221) | Non-T2D<br>(4,569) | Adjusting<br>for T2D | Adjusting<br>for T2D |
| rs10010131 | <i>WFS1</i>   | A            | G            | 0.19           | 0.20               | 0.004          | 0.99               | 0.08                 | 0.28                 |
| rs5219     | <i>KCNJ11</i> | T            | C            | 0.09           | 0.04               | -              | -                  | 0.72                 | -                    |
| rs7901695  | <i>TCF7L2</i> | C            | T            | 0.06           | 0.02               | -              | -                  | 0.004                | -                    |
| rs8050136  | <i>FTO</i>    | A            | C            | 0.70           | 0.007              | -              | -                  | 0.03                 | -                    |

eGFR, estimated glomerular filtration rate using MDRD equation; UACR, urine albumin-to-creatinine ratio; T2D, type 2 diabetes

Supplemental Table 4. Center-specific and meta-analyses of SNP associations with incident chronic kidney disease for SHS participants

| SNP (gene) Center           | No. total | No. of events | $\beta$ per allele copy | SE     | P value* | OR   | 95% CI    | Heterogeneity I <sup>2</sup> |
|-----------------------------|-----------|---------------|-------------------------|--------|----------|------|-----------|------------------------------|
| rs10010131 ( <i>WFS1</i> )  |           |               |                         |        |          |      |           |                              |
| Arizona                     | 1027      | 174           | -0.0328                 | 0.3703 | 0.93     | 0.97 | 0.47-2.00 |                              |
| Oklahoma                    | 1024      | 165           | 0.0363                  | 0.1587 | 0.82     | 1.04 | 0.76-1.42 |                              |
| Dakotas                     | 1109      | 137           | -0.1423                 | 0.1880 | 0.45     | 0.87 | 0.60-1.25 |                              |
| Meta-analysis               | 3160      | 476           |                         |        |          | 1.04 | 0.83-1.30 | 0.0%                         |
| rs7901695 ( <i>TCF7L2</i> ) |           |               |                         |        |          |      |           |                              |
| Arizona                     | 1027      | 174           | 0.0213                  | 0.2124 | 0.92     | 1.02 | 0.67-1.55 |                              |
| Oklahoma                    | 1027      | 166           | 0.0216                  | 0.1870 | 0.91     | 1.02 | 0.71-1.47 |                              |
| Dakotas                     | 1104      | 137           | -0.0578                 | 0.2167 | 0.79     | 0.94 | 0.62-1.44 |                              |
| Meta-analysis               | 3158      | 477           |                         |        |          | 1.00 | 0.79-1.26 | 0.0%                         |
| rs8050136 ( <i>FTO</i> )    |           |               |                         |        |          |      |           |                              |
| Arizona                     | 1023      | 173           | -0.2403                 | 0.1946 | 0.22     | 0.79 | 0.54-1.15 |                              |
| Oklahoma                    | 1025      | 164           | -0.0015                 | 0.1908 | 0.99     | 1.00 | 0.69-1.45 |                              |
| Dakotas                     | 1110      | 138           | 0.5645                  | 0.2030 | 0.01     | 1.76 | 1.18-2.62 |                              |
| Meta-analysis               | 3158      | 475           |                         |        |          | 1.10 | 0.88-1.37 | 76.0%                        |
| rs9939609 ( <i>FTO</i> )    |           |               |                         |        |          |      |           |                              |
| Arizona                     | 1021      | 170           | -0.2748                 | 0.1998 | 0.17     | 0.76 | 0.51-1.12 |                              |
| Oklahoma                    | 1012      | 166           | 0.0425                  | 0.1882 | 0.82     | 1.04 | 0.72-1.51 |                              |
| Dakotas                     | 1107      | 137           | 0.5758                  | 0.2031 | 0.005    | 1.78 | 1.20-2.65 |                              |
| Meta-analysis               | 3140      | 473           |                         |        |          | 1.11 | 0.89-1.39 | 78.0%                        |

\* Adjustment for baseline age, gender and BMI.

SNP, single nucleotide polymorphism; SE, standard error; OR, odds ratio; CI, confidence interval

Supplemental Table 5. Center-specific and meta-analyses results of SNP associations with incident microalbuminuria for SHS participants

| SNP (gene) Center           | No. total | No. of events | $\beta$ per allele copy | SE     | P value* | OR   | 95% CI    | Heterogeneity I <sup>2</sup> |
|-----------------------------|-----------|---------------|-------------------------|--------|----------|------|-----------|------------------------------|
| rs10010131 ( <i>WFS1</i> )  |           |               |                         |        |          |      |           |                              |
| Arizona                     | 574       | 178           | -0.4439                 | 0.4586 | 0.33     | 0.64 | 0.26-1.58 |                              |
| Oklahoma                    | 795       | 141           | -0.2251                 | 0.1756 | 0.20     | 0.80 | 0.57-1.13 |                              |
| Dakotas                     | 893       | 178           | 0.0422                  | 0.1626 | 0.80     | 1.04 | 0.76-1.43 |                              |
| Meta-analysis               | 2262      | 497           |                         |        | 0.37     | 0.90 | 0.72-1.13 | 0.0%                         |
| rs7901695 ( <i>TCF7L2</i> ) |           |               |                         |        |          |      |           |                              |
| Arizona                     | 574       | 178           | 0.0200                  | 0.2296 | 0.93     | 1.02 | 0.65-1.60 |                              |
| Oklahoma                    | 798       | 143           | -0.3893                 | 0.2173 | 0.07     | 0.68 | 0.44-1.04 |                              |
| Dakotas                     | 888       | 177           | -0.1268                 | 0.1956 | 0.52     | 0.88 | 0.60-1.29 |                              |
| Meta-analysis               | 2260      | 498           |                         |        | 0.17     | 0.85 | 0.66-1.08 | 0.0%                         |
| rs8050136 ( <i>FTO</i> )    |           |               |                         |        |          |      |           |                              |
| Arizona                     | 571       | 176           | -0.1460                 | 0.2011 | 0.47     | 0.86 | 0.58-1.28 |                              |
| Oklahoma                    | 797       | 144           | -0.1093                 | 0.2021 | 0.59     | 0.90 | 0.60-1.33 |                              |
| Dakotas                     | 894       | 179           | -0.3517                 | 0.2257 | 0.12     | 0.70 | 0.45-1.10 |                              |
| Meta-analysis               | 2262      | 499           |                         |        | 0.11     | 0.83 | 0.65-1.05 |                              |
| rs9939609 ( <i>FTO</i> )    |           |               |                         |        |          |      |           |                              |
| Arizona                     | 573       | 177           | -0.0862                 | 0.2011 | 0.67     | 0.92 | 0.62-1.36 | 0.0%                         |
| Oklahoma                    | 786       | 141           | -0.0836                 | 0.2035 | 0.68     | 0.92 | 0.62-1.37 |                              |
| Dakotas                     | 891       | 178           | -0.3372                 | 0.2257 | 0.14     | 0.71 | 0.46-1.11 |                              |
| Meta-analysis               | 2250      | 496           |                         |        | 0.19     | 0.86 | 0.67-1.08 | 0.0%                         |

\* Adjustment for baseline age, gender and BMI.

SNP, single nucleotide polymorphism; SE, standard error; OR, odds ratio; CI, confidence interval
